# Supplementary material
Source: Springer Nature journal article supplement (https://www.springermedizin.de/resource/supplementary/12879_2007_677_MOESM3_ESM.pdf/9449484)
Supplement: MOESM3 [file 9449484]

# Cytokines in Dengue Fever

## Inflammatory Cytokines

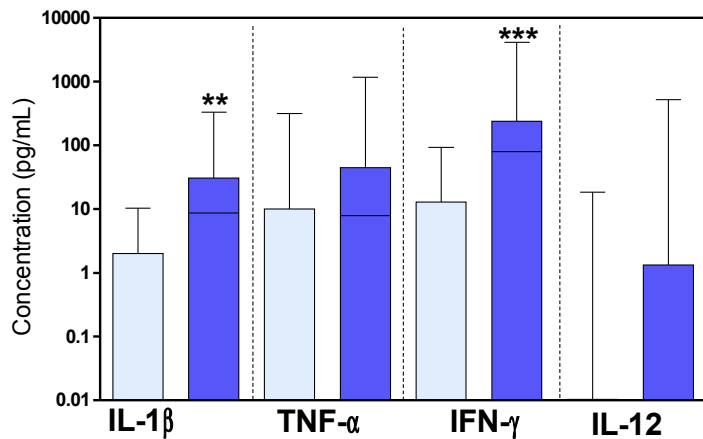

## Humoural Cytokines

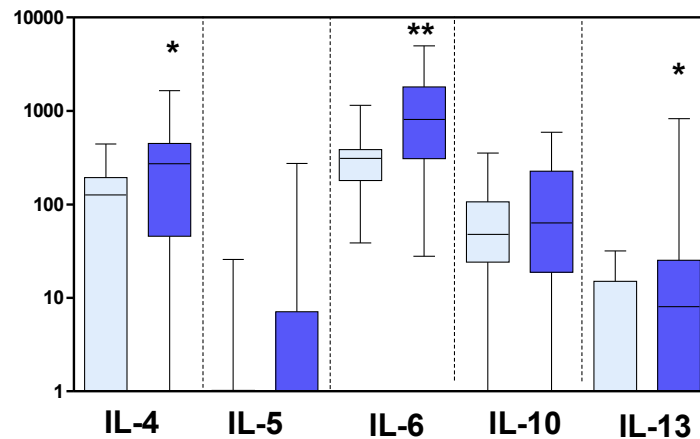

## Growth & Cellular Cytokines

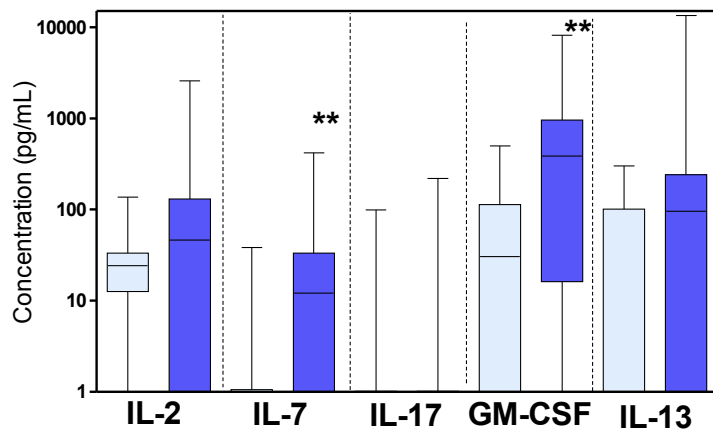

## Chemokines

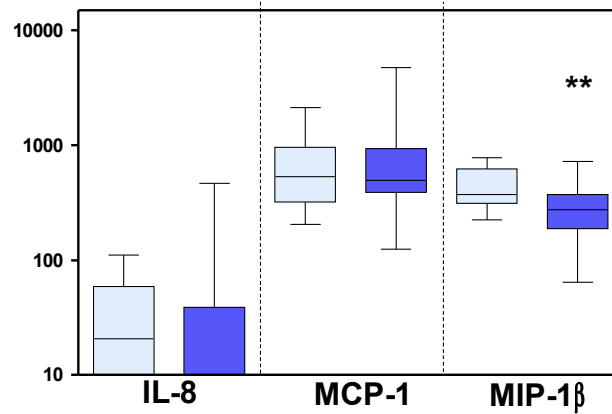

Mild

Severe
